# Supplementary material
Source: PubMed Central journal article supplement (PMC6822692)
Supplement: NIHMS1056484-supplement-Supplementary_Table_1.pdf [file NIHMS1056484-supplement-Supplementary_Table_1.pdf]

**Supplementary Table 1. Residues identified to affect substrate binding and/or selectivity in ABC type I exporters.**

| <b>Protein</b>      | <b>Residues and positions in respective genes</b>                                               | <b>Experiment to identify residue(s) as important</b>                                   | <b>Ref.<sup>a</sup></b>                                                                                                                                         |
|---------------------|-------------------------------------------------------------------------------------------------|-----------------------------------------------------------------------------------------|-----------------------------------------------------------------------------------------------------------------------------------------------------------------|
| <b>TAP</b>          |                                                                                                 |                                                                                         |                                                                                                                                                                 |
| HsTAP2              | C213                                                                                            | Mutagenesis to affect substrate transport                                               | 59                                                                                                                                                              |
| HsTAP2              | A374D                                                                                           | Mutant affects substrate specificity                                                    | 58, 55                                                                                                                                                          |
| RnTAP2 <sup>b</sup> | A217, E218, Q262, S265, L266                                                                    | Chimeric transporter experiments                                                        | 61                                                                                                                                                              |
| RnTAP2 <sup>b</sup> | E218                                                                                            | Mutagenesis affects transport of R-C-term peptides, validated by BMOE crosslinking      | 60                                                                                                                                                              |
| RnTAP2 <sup>b</sup> | Q262, S265, L266                                                                                | Mutagenesis has small effect on transport by selectivity for C-term of peptides         | 60                                                                                                                                                              |
| RnTAP1              | C273                                                                                            | BMOE crosslinking of cysteine-containing TC6R peptide with TAP abrogated by C273A       | 60                                                                                                                                                              |
| RnTAP1              | Y385                                                                                            | Mutagenesis affects peptide interaction, and favors interaction with hydrophobic C-term | 60                                                                                                                                                              |
| RnTAP1              | E436                                                                                            | BMOE crosslinking of cysteine-containing TC2R peptide to E436C, polymorphism in GgTAP1  | 60                                                                                                                                                              |
| RnTAP1              | C273, Y385, E436, D278, Y326                                                                    | 9-mer peptide docking by anchoring to experiments                                       | 60                                                                                                                                                              |
| RnTAP2              | E218, Q262, S265, L266, E418, Q424                                                              | 9-mer peptide docking by anchoring to experiments                                       | 60                                                                                                                                                              |
| GgTAP1              | R289[B4] <sup>c</sup> , K131[B4] <sup>c</sup> , D234[B15] <sup>c</sup> , E289[B15] <sup>c</sup> | Docking of acidic/peptides to alleles B4/B15 interact with polymorphisms                | 60; Walker B. A., et al, <i>Proc Natl Acad Sci U S A</i> <b>108</b> , 8396-401, 2011                                                                            |
| GgTAP2              | R216[B4] <sup>c</sup> , G216[B15] <sup>c</sup>                                                  | Docking of acidic/peptides to alleles B4/B15 interact with polymorphisms                | 60; Walker B. A., et al, <i>Proc Natl Acad Sci U S A</i> <b>108</b> , 8396-401, 2011                                                                            |
| HsTAP1              | V348C, E350                                                                                     | BM[PEO] <sub>3</sub> crosslinking of P6-peptide, proteolysis with BABE at P6            | 60; Herget, M. et al, <i>J Biol Chem</i> <b>282</b> , 3871-80, 2007                                                                                             |
| HsTAP1              | A433 to M480, Q513 to R547                                                                      | Peptide substrate crosslinked segment                                                   | Nijenhuis, M. & Hammerling, G.J., <i>J Immunol</i> <b>157</b> , 5467-77, 1996; Walker B. A., et al, <i>Proc Natl Acad Sci U S A</i> <b>108</b> , 8396-401, 2011 |
| HsTAP2              | P301 to M389, I414 to M433                                                                      | Peptide substrate crosslinked segment                                                   | Nijenhuis, M. & Hammerling, G.J., <i>J Immunol</i> <b>157</b> , 5467-77, 1996; Walker B. A., et al, <i>Proc Natl Acad Sci U S A</i> <b>108</b> , 8396-401, 2011 |
| <b>MRP1</b>         |                                                                                                 |                                                                                         |                                                                                                                                                                 |
| BtMRP1              | K332, H335, L381, F385, Y440, F594, R1196, N1244, R1248                                         | P-pocket, polar and non-polar contacts                                                  | 37                                                                                                                                                              |

|             |                                                                                                                                                   |                                                                                    |                                                                                                                                                            |
|-------------|---------------------------------------------------------------------------------------------------------------------------------------------------|------------------------------------------------------------------------------------|------------------------------------------------------------------------------------------------------------------------------------------------------------|
| BtMRP1      | W553, T550, M1092, Y1242, W1245                                                                                                                   | H-pocket, hydrophobic van-der-Waals contacts                                       | 37                                                                                                                                                         |
| BtMRP1      | K332, H335, L381, F385, F389, T439, Y440, T550, W553, F594, M601, M1092, S1096, R1196, Y1242, N1244, W1245, R1248                                 | Within 4 Å of substrate LTC4 in PDB 5UJA                                           | 37                                                                                                                                                         |
| <b>P-gp</b> |                                                                                                                                                   |                                                                                    |                                                                                                                                                            |
| HsP-gp      | Y118, V125, S222, I306, S766, I868, G872                                                                                                          | Crosslinking with inhibitor affects drug binding                                   | 50                                                                                                                                                         |
| HsP-gp      | L339, A342, F942, T945, L975, V982, A985                                                                                                          | Crosslinking with inhibitor affects drug binding                                   | Loo, T.W. & Clarke, D.M., <i>J Biol. Chem.</i> <b>272</b> , 31945-31948, 1997;<br>Loo, T.W. & Clarke, D.M., <i>J Biol Chem</i> <b>274</b> , 35388-92, 1999 |
| HsP-gp      | F728                                                                                                                                              | Cysteine crosslinking affects ATPase stimulation ny drug                           | 48                                                                                                                                                         |
| HsP-gp      | I306, F343                                                                                                                                        | Cysteine crosslinking with MTS-verapamil and MTS-rhodamine affects ATPase activity | 51                                                                                                                                                         |
| HsP-gp      | L65, M69, W232, A233, F303, I306 Y310, F336, L339, I340, F343, Q347, Q725, E875, M876, L879, Q946, M949, Y950, Y953, F983, M986, A987, Q990, V991 | Within 4 Å of substrate Zosuquidar in PDB 6FN1                                     | 26                                                                                                                                                         |
| <b>MsbA</b> |                                                                                                                                                   |                                                                                    |                                                                                                                                                            |
| EcMsbA      | R78, R148, Q256, R296, K299                                                                                                                       | Binding of head-group of LPS                                                       | 64                                                                                                                                                         |
| EcMsbA      | M75, L263, I292                                                                                                                                   | Non-polar contacts to LPS tail                                                     | 64                                                                                                                                                         |
| EcMsbA      | R78, R296, Q307, D41, L45, Q256, S260, L263, F288, I293, A294                                                                                     | Within 4 Å of substrate LPS in PDB 5TV4                                            | 64                                                                                                                                                         |

<sup>a</sup> Reference numbers correspond to reference list with additional citations listed in full.

<sup>b</sup> Experiments done with RnTAP2[a/u], where [a/u] represent alleles that are present in strains of *R. norvegicus*.

<sup>c</sup> [B4] and [B15] are alleles present in different *G. gallus* subpopulations.
